## RESEARCH ARTICLE

# Ontogeny of effective mechanical advantage in eastern cottontail rabbits (*Sylvilagus floridanus*)

Adam D. Foster<sup>1</sup>, Michael T. Butcher<sup>2</sup>, Gregory A. Smith<sup>3</sup>, Gabrielle A. Russo<sup>4</sup>, Rajaa Thalluri<sup>5</sup> and Jesse W. Young<sup>5,\*</sup>

## ABSTRACT

Juvenile animals must survive in the same environment as adults despite smaller sizes, immature musculoskeletal tissues, general ecological naïveté and other limits of performance. Developmental changes in muscle leverage could constitute one mechanism to promote increased performance in juveniles despite ontogenetic limitations. We tested this hypothesis using a holistic dataset on growth and locomotor development in wild eastern cottontail rabbits (*Sylvilagus floridanus*) to examine ontogenetic changes in hindlimb muscle effective mechanical advantage (EMA). EMA is a dimensionless index of muscle leverage, equal to the quotient of average muscle lever length and the load arm length of the ground reaction force (GRF), effectively representing the magnitude of output force arising from a given muscle force. We found that EMA at the hip and ankle joints, as well as overall hindlimb EMA, significantly declined across ontogeny in *S. floridanus*, whereas EMA at the knee joint remained unchanged. Ontogenetic decreases in EMA were due to isometric scaling of muscle lever arm lengths alongside positive ontogenetic allometry of GRF load arm lengths – which in turn was primarily related to positive allometry of hindlimb segment lengths. Greater EMA limits the estimated volume of hindlimb extensor muscle that has to be activated in young rabbits, likely mitigating the energetic cost of locomotion and saving metabolic resources for other physiological functions, such as growth and tissue differentiation. An additional examination of limb growth allometry across a diverse sample of mammalian taxa suggests that ontogenetic decreases in limb joint EMA may be a common mammalian trend.

**KEY WORDS:** Muscle leverage, Allometry, Development, Muscle force, Life history

## INTRODUCTION

Sub-adulthood can be a risky time of life for many animals. Smaller body sizes, immature musculoskeletal tissues and general ecological naïveté all compromise locomotor performance in juvenile animals (Carrier, 1996). Despite these limitations, juveniles must often compete and survive in the same environment as adults.

Demographic studies of age-based mortality in natural populations have shown that ecological stresses on sub-adult prey taxa are particularly acute, with the rate of death from predation being highest in the first few weeks of life (Case, 1978; Promislow and Harvey, 1990; Adams et al., 1995). Therefore, strong selection for mechanisms that allow juvenile prey to survive past this demographic bottleneck should be expected, permitting them to survive to reproductive adulthood.

In this study, we used a holistic dataset on growth and locomotor development in wild eastern cottontail rabbits [*Sylvilagus floridanus* (Allen 1890)] as a model system to understand how ontogenetic changes in muscle leverage might constitute one such mechanism to promote increased performance in juvenile prey taxa. Limbs typically operate as lever systems, powered by muscle torques applied at varying distances from the joint that must balance the torque induced by ground reaction forces (GRF) (Gray, 1944, 1968). The product of muscular force ( $F_m$ ) and its perpendicular distance from the center of the joint (muscle lever arm;  $r$ ) must equal the product of the GRF ( $F_g$ ) and its perpendicular distance from the center of the joint (i.e. GRF load arm;  $R$ ) (see Fig. 1):

$$F_m r = F_g R. \quad (1)$$

Algebraically rearranging this equation shows that the ratio of output force (i.e.  $F_g$ ) to a given input force (i.e.  $F_m$ ) equals the ratio of  $r$  (i.e. the lever arm of the muscular force) to  $R$  (i.e. the load arm of the GRF):

$$\frac{F_g}{F_m} = \frac{r}{R}. \quad (2)$$

The ratio  $r/R$  quantifies the effective mechanical advantage (EMA) at a given limb joint. Maintaining all else equal, increases in EMA will necessarily lead to a relatively high output force for a given muscle force (Smith and Savage, 1956; Gray, 1968; Biewener, 1989, 1990, 1991; Roberts et al., 1998).

Increasing extensor muscle EMA, either through growth-related changes in  $r$  or through postural adjustments to shorten  $R$ , represents one hypothetical strategy that juvenile animals could use to overcome absolutely weaker limb muscles and other growth-related limits on locomotor performance (Carrier, 1983, 1996; Young, 2005). Here, we test three specific predictions related to this hypothesis. Firstly, we predicted juvenile cottontail rabbits would have greater hindlimb joint EMA than adult conspecifics, either through negative ontogenetic allometry of  $r$  (i.e. a greater EMA numerator in young animals), positive ontogenetic allometry of  $R$  (i.e. a smaller EMA denominator in young animals) or a combination of these two scaling trends. Secondly, we predicted that ontogenetic variation in  $R$  will be associated with variation in joint posture, GRF orientation, limb length distal to the joint or a combination of these factors. Finally, as a functional consequence

<sup>1</sup>Department of Anatomy, School of Osteopathic Medicine, Campbell University, Buies Creek, NC 27506, USA. <sup>2</sup>Department of Biological Sciences, Youngstown State University, Youngstown, OH 44555, USA. <sup>3</sup>Department of Biological Sciences, Kent State University at Stark, North Canton, OH 44720, USA. <sup>4</sup>Department of Anthropology, Stony Brook University, Stony Brook, NY 11794-436, USA. <sup>5</sup>Department of Anatomy and Neurobiology, Northeast Ohio Medical University (NEOMED), Rootstown, OH 44272, USA.

\*Author for correspondence (jwyong@neomed.edu)

ORCID iD: A.D.F., 0000-0002-1265-8171; M.T.B., 0000-0001-7323-5132; G.A.S., 0000-0002-8247-559X; G.A.R., 0000-0002-2203-1831; R.T., 0000-0003-1586-0911; J.W.Y., 0000-0001-5358-9339

**List of symbols and abbreviations**

|                                 |                                                                                      |
|---------------------------------|--------------------------------------------------------------------------------------|
| $a_{CoM}$                       | mean acceleration of the center of mass                                              |
| $a_{z0}$                        | vertical thickness of the force platform's cover plate                               |
| BF                              | biceps femoris                                                                       |
| CoP                             | center of pressure                                                                   |
| EMA                             | effective mechanical advantage                                                       |
| $F_m$ ( $F_a$ , $F_k$ , $F_h$ ) | extensor muscle force (about the ankle, knee and hip, respectively)                  |
| $F_y$                           | fore–aft component of the ground reaction force                                      |
| $F_z$                           | vertical component of the ground reaction force                                      |
| GC                              | gastrocnemius                                                                        |
| GRF/ $F_g$                      | ground reaction force                                                                |
| HS                              | hamstring                                                                            |
| $L_F$                           | muscle fascicle length                                                               |
| $L_{mean}$                      | mean muscle fascicle length (weighted by PCSA)                                       |
| $M_a$ , $M_k$ , $M_h$           | extensor muscle moment about the ankle, knee and hip, respectively                   |
| $m_{mb}$                        | muscle belly mass                                                                    |
| $M_x$                           | moment about the $x$ -axis (mediolateral axis) of the force platform                 |
| PCSA                            | physiological cross-sectional area                                                   |
| $R$                             | ground reaction force load arm length                                                |
| $r$ ( $r_a$ , $r_k$ , $r_h$ )   | extensor muscle force lever arm length (about the ankle, knee and hip, respectively) |
| RF                              | rectus femoris                                                                       |
| SM                              | semimembranosus                                                                      |
| $V_{musc}$                      | active muscle volume                                                                 |
| $\theta$                        | muscle fascicle pennation angle                                                      |
| $\theta_{GRF}$                  | sagittal GRF angle                                                                   |
| $\rho$                          | skeletal muscle density                                                              |

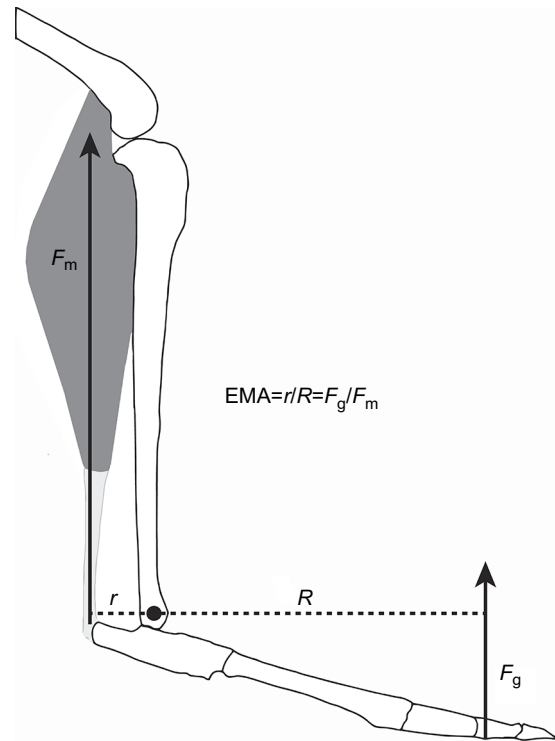

**Fig. 1. Schematic drawing of effective mechanical advantage (EMA) at the ankle joint of *Sylvilagus floridanus*.** To maintain moment balance about a limb joint, muscle force ( $F_m$ ) must act on its lever arm ( $r$ ) to produce a torque that equals that produced by ground reaction force ( $F_g$ ) acting on its load arm ( $R$ ). Increasing  $r$  and/or decreasing  $R$  will necessarily increase ground reaction forces for a given level of muscle force.

of greater hindlimb muscle EMA, we predicted that juvenile *S. floridanus* would require less active muscle volume to support their body weight and power locomotion (proportional to the metabolic cost; Roberts et al., 1998; Biewener et al., 2004; Pontzer et al., 2008).

## MATERIALS AND METHODS

### Data collection

#### Institutional oversight and compliance

We obtained approval from the Northeast Ohio Medical University (NEOMED) Institutional Animal Care and Use Committee for all procedures (protocols 10-032 and 13-026, to J.W.Y.) and secured Scientific Collecting permits from the Ohio Division of Natural Resources Division of Wildlife (permits 14-310, 15-173 and 16-128, to G.A.S.) prior to initiating this research.

#### Animal capture and assessment

Eastern cottontail rabbits (*S. floridanus*) were trapped at several sites in Portage, Summit and Columbiana Counties, Ohio, USA, where we secured prior permission for trapping from site owners or controlling authorities. All sites were public parks, nature preserves or private properties where hunting was forbidden. We used a combination of wooden rabbit traps (Wildlife Control Supplies, East Granby, CT, USA) and medium-sized wire traps (Tomahawk Model 606SS, Tomahawk Live Trap, Hazelhurst, WI, USA). Traps were baited with a variety of lures, including oats, peanut butter, apples and rabbit urine, set in the early evening and checked the subsequent morning.

We transported captured animals to the Portage Park District Breakeck Creek Field Station, where we recorded body mass to the nearest gram, shaved and marked major hindlimb joints with small circles of retro-reflective tape for later video tracking, and measured

hindlimb segment lengths to the millimeter using digital calipers. A list of joints marked, landmarks used for identification and hindlimb segment definitions are presented in Table 1.

We trapped a total of 61 rabbits over three field seasons from 2013 to 2015. Owing to variation in animal condition and motivation, and occasional equipment malfunction, we were only able to collect locomotor performance data in 42 rabbits. Of the animals contributing locomotor performance data, we euthanized 14 animals for detailed anatomical study, including measurements of  $r$  for several hindlimb extensor muscles and fiber architecture (see below; Butcher et al., 2019). The sample for the present study consists of a subset of 13 individuals for whom we obtained sufficient kinematic and morphological data to calculate EMA. Overall, the ontogenetic *S. floridanus* dataset used here extended over an order of magnitude in body mass (i.e. 0.106–1.277 kg). Individual *S. floridanus* with a body mass <1 kg were designated as ‘juveniles’; animals with a body mass >1 kg were designated as ‘adults’. This 1 kg body mass cut-off corresponds to the age at which body mass growth begins to reach asymptotic values and long bone epiphyses fuse (Hale, 1949; Lord, 1963). Based on a published body mass growth curve (Lord, 1963), we estimated that rabbits in our sample ranged from juveniles approximately 22 days of age to fully grown adults. Following these criteria, the animal sample for this study included eight juvenile and five adult rabbits.

#### Performance testing

Following joint marking, rabbits were placed in a dark transport box that was secured to the end of an enclosed runway (4.0×0.2×1.0 m, length×width×height). Rabbits were coaxed to move from the

**Table 1. Anatomical landmarks used to define joints and measure postcranial segment lengths**

| Joint                     | Landmark                               |                                            |
|---------------------------|----------------------------------------|--------------------------------------------|
| Hip                       | Proximolateral tip of third trochanter |                                            |
| Knee                      | Lateral epicondyle of femur*           |                                            |
| Ankle                     | Lateral malleolus                      |                                            |
| Metatarsophalangeal (MTP) | Head of fifth metatarsal               |                                            |
| Segment                   | Proximal landmark                      | Distal landmark                            |
| Thigh                     | Hip joint marker                       | Knee joint marker                          |
| Leg                       | Knee joint marker                      | Ankle joint marker                         |
| Foot                      | Calcaneal tuber                        | Distal tip of third digit (excluding claw) |

To minimize the duration of animal handling, joints were marked and segments were measured on the left side of the animal only.

\*Post-experiment review of trial videos indicated that the knee marker was prone to substantial skin movement, compromising measurement accuracy. Therefore, for analyses of locomotor kinematics, the knee position was calculated analytically on a frame-by-frame basis following the protocol of McGowan (2005). Briefly, for each frame of the video during a hindlimb contact period, we generated the equations of two circles, centered at the hip and ankle with the measured length of the thigh and leg segments as their radii. These two circles had, at most, two points of intersection: one cranial to the hip–ankle vector (indicating knee joint flexion), and another caudal to it (indicating joint hyperextension). The knee joint coordinate was designated as the point of intersection that avoided placing the joint in hyperextension.

transport box to a corresponding box at the other end of the runway using mildly aversive stimuli (e.g. puffs of air from a compressed air canister) to encourage maximum effort. Two HE6×6-16 small animal force plates (AMTI, Watertown, MA, USA; 15×15 cm in area) were embedded in the floor of the runway to measure GRF during bounding strides of burst acceleration. Forces were sampled at 500 Hz using proprietary software (NetForce, AMTI). The force plates were covered with stairway tread tape (Safety-Walk Slip Resistant Tread, 3M Corp., Minneapolis, MN, USA). Locomotion was filmed with two high-speed cameras (Fastec TS3 100-L, Fastec Imaging, San Diego, CA, USA) also using proprietary software (HiSpec, Fastec Imaging). The cameras were placed approximately 45 deg to the direction of travel and positioned approximately 90 deg relative to one another. Force platform and camera recordings were synchronized by means of a common trigger.

## Data processing

### Locomotor data processing

Video and force platform data were processed in MATLAB R2018a (MathWorks, Natick, MA, USA). We used the open source motion-tracking software DLTdv5 (Hedrick, 2008) to track the position of all landmarks throughout each video clip. The 3D position of each anatomical landmark was reconstructed using direct linear transformation (DLT) (Hedrick, 2008). DLT coefficients were generated using DLTcal5, a companion program to DLTdv5, by digitizing a control object of known geometry that had been filmed immediately prior to each locomotor data collection. The orientation axes of the calibration object were made coincident with those of the force platforms. We also used the DLTdv5 software to demarcate the beginning and end of the hindlimb push-off phase of the stride (i.e. from hindlimb touchdown to lift-off). Only full- or half-bounding strides, where the separation between leading and trailing hindlimb contacts were separated by ≤10% of hindlimb contact duration (Hildebrand, 1977), and where the rabbit was fully supported by one or both force platforms for the duration of hindlimb push-off, were included in the dataset.

Synchronized force and kinematic data were imported in a custom-written MATLAB routine for additional processing. Joint coordinates were fit to a quintic smoothing spline function (tolerance of 0.75 mm<sup>2</sup>), allowing us to mitigate digitizing error and interpolate the position of a feature for frames where the marker was not visible (Walker, 1998). Force traces from each channel of the force plates were smoothed using a zero-lag fourth-order Butterworth low-pass filter. Filter cut-off frequencies were selected

using an automated procedure developed by Winter (2005), designed to balance noise reduction against signal attenuation [mean selected frequency±95% confidence interval (CI)=51±2.9 Hz]. Force plate baseline drift during the experiment was corrected by sampling the average values of unloaded periods immediately prior to and following contact and subtracting these values from the force traces. Further analyses only consider movements in the sagittal plane (i.e. we ignored mediolateral forces and displacements). Overall, average mediolateral force magnitudes were about half of fore–aft force magnitudes (mean±95% CI=54.8±25.4%). Moreover, given the narrow width of the testing runway, mediolateral impulse could not contribute to animal displacement in the net direction of travel, and should therefore be considered ‘wasted effort’.

The fore–aft position of the center of pressure (CoP) was calculated from filtered force data as:

$$\text{CoP} = \frac{-M_x + F_y \times a_{z_0}}{F_z}, \quad (3)$$

where  $M_x$  is the moment about the  $x$ -axis (i.e. mediolateral axis) of the force platform,  $F_y$  and  $F_z$  are the forces in the fore–aft and vertical directions, respectively, and  $a_{z_0}$  is the thickness of the vertical offset of the force platform’s cover plate relative to the position of the sensors. Instantaneous values of  $M_x$ ,  $F_y$  and  $F_z$  were determined using the NetForce software, whereas  $a_{z_0}$  was provided by the force plate manufacturer. Given that, by definition, the half-bounding gaits used by the rabbits involve simultaneous contact by the right and left hindlimbs – which may or may not be spatially aligned – the raw CoP position indicated by the force plate calculation alone did not always sensibly align with the kinematic coordinates (which were only digitized on the left side of the animal). The CoP position was therefore set to the midpoint of the distance between the metatarsal head and the distal tip of the third pedal digit at the beginning of the support phase, and then allowed to subsequently translate, as indicated by the frame-to-frame changes in CoP position calculated from the force plate data (with the constraint that the CoP could never move beyond the tip of the third digit or proximal to the metatarsal head). We also assumed a common fore–aft CoP position across both limbs in subsequent calculations of joint moments (McGowan, 2005).

### Measurement of extensor muscle fiber architecture

The subset of rabbits designated for our morphometric sample was transported to a laboratory at NEOMED immediately following

**Table 2. Functional muscle groups used to define net extensor muscle lever arm lengths ( $r$ ) at each joint**

| Muscle                                          | Abbreviation |
|-------------------------------------------------|--------------|
| Hip extensors                                   |              |
| m. gluteus profundus                            | GP           |
| m. gluteus medialis                             | GM           |
| m. biceps femoris (vertebral and pelvic heads)* | BF           |
| m. semimembranosus*                             | SM           |
| Knee extensors                                  |              |
| m. vastus lateralis                             | VL           |
| m. rectus femoris*                              | RF           |
| Ankle extensors (plantarflexors)                |              |
| m. gastrocnemius (lateral and medial heads)*    | GC           |
| m. soleus                                       | S            |

\*Biarticular muscles.

locomotor data collection, and euthanized with a fatal dosage of pentobarbital (1 ml kg<sup>-1</sup>). At least one hindlimb from each individual was systematically dissected. We measured muscle architecture from selected hip, knee and ankle extensors (Table 2), following previously published protocols (Butcher et al., 2010). Briefly, with the muscle–tendon unit still intact, digital calipers were used to take three measurements of muscle lever arm length ( $r$ ) to the nearest 0.01 mm, with the relevant joint positioned at ~90 deg (i.e. joint position at locomotor mid-stance). Muscles were then individually excised from the hindlimb and with their tendons removed; muscle belly mass ( $m_{mb}$ ) was measured with an electronic balance to the nearest 0.01 g. Muscle fascicle length ( $L_F$ ; in cm) and pennation angle ( $\theta$ ; measured as the angle between the fiber fascicles and either the long axis of the muscle or internal tendon) were measured at five to 10 random locations representative of both proximal-to-distal and superficial-to-deep regions throughout each muscle belly. Physiological cross-sectional area (PCSA, in cm<sup>2</sup>; an indicator of maximum isometric force capacity) was then calculated as:

$$PCSA = \frac{m_{mb} \times \cos \theta}{L_F \times \rho}, \quad (4)$$

where  $\rho$  represents a standard value of density (1.06 g cm<sup>-3</sup>) for mammalian skeletal muscle (Méndez and Keys, 1960).

Average muscle lever arm lengths at the hip, knee, and ankle joints (i.e.  $r_h$ ,  $r_k$  and  $r_a$ ) were measured as the mean of all individual extensor lever arm lengths at the joint, weighted by the PCSA of the corresponding muscle. This method assumes that muscle stress (i.e. force per unit area) is distributed equally across the muscles at a joint. Additionally, this method assumes that lever arm lengths remain constant through changes in joint position. Data on instantaneous changes in muscle lever arm lengths in European hares (*Lepus europaeus*, a closely related leporine taxon) indicate that for the muscles studied here, values of  $r$  remain fairly constant over the ranges of joint excursion observed in our *S. floridanus* locomotor dataset, particularly relative to changes in GRF load arm lengths (Williams et al., 2007).

### Dependent variables

#### Effective mechanical advantage

Though EMA is often calculated as the ratio of  $r$  and  $R$  (see Eqn 1 and Fig. 1), we used an algebraically equivalent formulation to calculate EMA as the ratio of GRF impulse to muscle force impulse at the joint in question:

$$EMA = \frac{\int_{t_1}^{t_2} F_g}{\int_{t_1}^{t_2} F_m}, \quad (5)$$

where  $t_1$  and  $t_2$  represent the beginning and end of the support phase interval. This quotient indicates how much force, on average, was exerted on the substrate per unit muscle force. This method has the benefit of characterizing mean EMA throughout the support phase, rather than at finite instances or intervals, and allows for the variation in  $R$  that can result from changing joint postures throughout the support phase.

GRF impulse was calculated as the finite integral of the resultant sagittal plane GRF throughout the support phase. To calculate muscle force impulse, we first determined joint moments throughout the support phase as the frame-by-frame cross-product of the sagittal plane GRF vector and a sagittal plane position vector connecting the CoP to the joint marker in question. Following Biewener et al. (2004), instantaneous agonist muscle forces across the joint were then calculated using the following set of equations:

$$F_a = \frac{M_a}{r_a}, \quad (6)$$

$$F_k = \frac{M_k}{r_k} - F_{GC,k} r_{GC,k} - F_{HS,k} r_{HS,k}, \quad (7)$$

$$F_h = \frac{M_h}{r_h} - F_{RF,h} r_{RF,h}, \quad (8)$$

where  $F$ ,  $M$  and  $r$  represent muscle forces, joint moments and mean lever arm lengths, respectively, at the ankle (a), knee (k) and hip (h) joints. The subtracted terms in Eqns 7 and 8 represent the flexor action of biarticular muscles [GC, gastrocnemius; HS, hamstring muscles, i.e. biceps femoris (BF) and semimembranosus (SM); and RF, rectus femoris]. Flexor forces for these muscles were assumed to be equal to extension forces, weighted according to their contribution to total extensor muscle PCSA at the joint in question:

$$F_{GC,k} = F_a \times \frac{PCSA_{GC}}{PCSA_{GC} + PCSA_S}, \quad (9)$$

$$F_{HS,k} = F_h \times \frac{PCSA_{BF} + PCSA_{SM}}{PCSA_{BF} + PCSA_{SM} + PCSA_{GP} + PCSA_{GM}}, \quad (10)$$

$$F_{RF,h} = F_k \times \frac{PCSA_{RF}}{PCSA_{RF} + PCSA_{VL}}, \quad (11)$$

where muscle abbreviations follow those listed in Table 2. This set of equations was solved for each instance (i.e. video frame) of the support phase, first solving Eqn 6 and subsequently solving Eqns 7 and 8 as a set of simultaneous linear equations (using MATLAB's

**Table 3. Ontogenetic allometry of effective mechanical advantage (EMA) in *Sylvilagus floridanus***

| Model              | $\beta$       | Statistic       | $P$   | $R^2$ |
|--------------------|---------------|-----------------|-------|-------|
| Hip EMA            |               |                 |       |       |
| Body mass          | <b>-0.440</b> | $F_{1,10}=5.6$  | 0.039 | 0.214 |
| Mean $a_{CoM}$     | <b>-0.204</b> | $F_{1,72}=5.1$  | 0.028 |       |
| Knee EMA           |               |                 |       |       |
| Body mass          | -0.226        | $F_{1,10}=1.94$ | 0.194 | 0.102 |
| Mean $a_{CoM}$     | <b>0.233</b>  | $F_{1,60}=4.93$ | 0.030 |       |
| Ankle EMA          |               |                 |       |       |
| Body mass          | <b>-0.490</b> | $F_{1,11}=8.1$  | 0.016 | 0.199 |
| Mean $a_{CoM}$     | -0.098        | $F_{1,82}=0.87$ | 0.353 |       |
| Total hindlimb EMA |               |                 |       |       |
| Body mass          | <b>-0.651</b> | $F_{1,9}=14.4$  | 0.004 | 0.394 |
| Mean $a_{CoM}$     | -0.115        | $F_{1,50}=1.41$ | 0.241 |       |

Bold values indicate significant partial regression coefficients (i.e.  $\beta$  weights).  $a_{CoM}$ , mean acceleration of the center of mass.



‘linsolve’ function). We then calculated total muscle force impulse at each joint as the finite integral of instantaneous muscle forces throughout the support phase, and then ultimately mean EMA over the support phase as the ratio of GRF impulse to muscle impulse. Total EMA across the hindlimb was calculated as the mean of individual joint EMA, weighted by the total extensor muscle PCSA at that joint.

As the goal of this study was to investigate how developmental changes in EMA impact locomotor performance (i.e. external work against the environment), we did not include calculations of the muscular effort required to resist gravitational moments or perform the internal work required to accelerate limb segments relative to the CoM (Wells, 1981; Biewener and Full, 1992; Winter, 2005). Though such components of total limb work could impact total

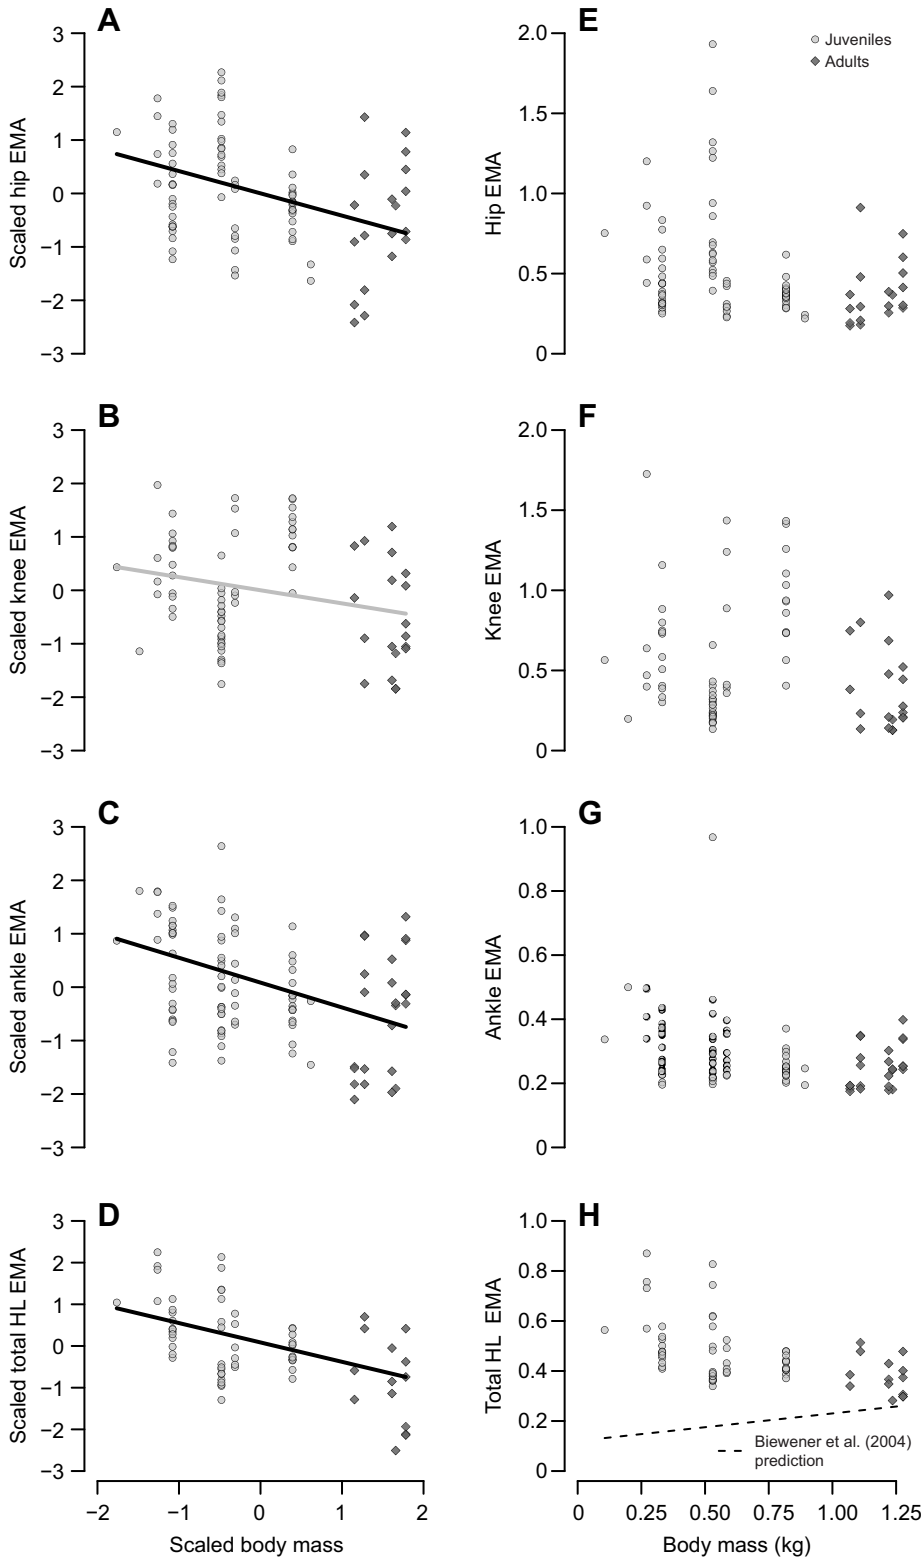

**Fig. 2. Ontogenetic changes in EMA in *S. floridanus*.** (A,E) Hip, (B,F) knee, (C,G) ankle and (D,H) total hindlimb (HL). Panels on the left present the Box–Cox transformed scaled and centered data used to calculate regression models, whereas panels on the right present the unscaled raw data. Data points represent individual strides across 13 rabbits (i.e. 78 strides distributed among eight juveniles and 24 strides distributed among five adults). Trend lines represent mixed-effects linear fits specifying individual rabbits as a random factor in the analysis. Gray shading indicates that the trend line is not significant ( $P > 0.05$ ). The dashed line in H indicates the predicted values of EMA for a generalized mammal of equivalent body mass, calculated using the interspecific scaling equation from Biewener et al. (2004).

energy expenditure, studies of non-human mammals have shown that inertial and gravitational moments forces are minor relative to the external moments engendered by GRF, and therefore have less influence on estimates of muscle torque and leverage (Witte et al., 2002; Dutto, 2004; McGowan, 2005; Williams et al., 2009).

### Active muscle volume

Previous research has indicated that the metabolic cost of locomotion is directly proportional to the volume of muscle that must be activated to support and accelerate body mass (i.e.  $V_{\text{muscle}}$ ) (Roberts et al., 1998; Biewener et al., 2004; Pontzer et al., 2008). On the assumption that muscle force is proportional to PCSA (Sacks and Roy, 1982),  $V_{\text{muscle}}$  can be calculated as the product of mean muscle fascicle length ( $L_{\text{mean}}$ ) and muscle force impulse, divided by GRF impulse:

$$V_{\text{muscle}} = \frac{L_{\text{mean}} \int_{t_1}^{t_2} F_m}{\int_{t_1}^{t_2} F_g} \quad (12)$$

Following Roberts et al. (1998), we calculated  $L_{\text{mean}}$  as the mean of individual muscle fascicle lengths weighted by their PCSAs. We then calculated  $V_{\text{muscle}}$  as the quotient of  $L_{\text{mean}}$  and EMA.

### Acceleration

The locomotor data for this study were explicitly collected to measure peak acceleration performance in *S. floridanus* and were therefore not collected at steady-state velocities. Given that acceleration has the potential to impact EMA through an influence on limb posture and GRF orientation (Roberts and Scales, 2002; Biewener et al., 2004; Williams et al., 2009), we included average acceleration (calculated as average fore–aft force throughout hindlimb support phase divided by body mass) as a potential predictor of EMA.

### Mean GRF load arm lengths (R)

Average  $R$  across the support phase was calculated as the quotient of  $r$  and EMA (algebraically equivalent to dividing muscle moment by GRF moment; Eqns 1 and 2; Fig. 1).

### Mean joint angles

Joint angles were calculated as the two-dimensional vector angle between the relevant limb segments, with increasing values indicating greater limb joint extension. We calculated mean hip, knee and ankle joint angles throughout support phase to evaluate how changes in joint posture affected GRF load arm lengths ( $R$ ).

### GRF orientation

Given that variation in  $R$  is also partially determined by the orientation of the GRF with respect to the limb, we calculated the mean angle of the GRF vector relative to the vertical axis (i.e. the impulse angle; Lee, 2011) as:

$$\theta_{\text{GRF}} = \tan^{-1} \frac{\int_{t_1}^{t_2} F_y}{\int_{t_1}^{t_2} F_z}, \quad (13)$$

where  $F_y$  and  $F_z$  refer to the GRF components in the fore–aft and vertical directions, respectively.

### Statistical analyses

Analyses of the full dataset (i.e. where each individual was represented by multiple trials) were carried out using mixed-effects models (Pinheiro and Bates, 2000), where individual rabbit was

included as a random factor. To improve mixed-effect model fits, raw variates were first Box–Cox transformed to improve normality (Box and Cox, 1964; Sokal and Rohlf, 1995), and then scaled and centered (i.e. converted into  $z$ -scores). Conversion to  $z$ -scores also permitted direct comparisons of the resulting partial regression coefficients (i.e.  $\beta$  weights) from a multiple regression to evaluate which predictors best explained variance in the dependent variable. Because the residuals of such models were often characterized by heteroscedasticity, the variance of the error term was allowed to vary as an exponential function of the independent (i.e. predictor) variable. Coefficients of determination ( $R^2$ ) for these models were calculated following Johnson (2014). We used standard log–log Model II (reduced major axis) regressions on body mass to test for ontogenetic allometry of muscle lever arm lengths, average GRF load arm lengths and limb lengths. These analyses were conducted on reduced datasets, where only a single value existed for each individual. Significance for all tests was accepted at  $P \leq 0.05$ . All statistical analyses were conducted in the R statistical platform (version 3.5.2, ‘Feather Spray’) (<https://www.r-project.org/>), including the add-on packages `dplyr` (<https://CRAN.R-project.org/package=dplyr>), `emmeans` (<https://CRAN.R-project.org/package=emmeans>), `MASS` (Venables and Ripley, 2002), `MuMIn` (<https://CRAN.R-project.org/package=MuMIn>), `nlme` (<http://CRAN.R-project.org/package=nlme>) and `rptR` (Stoffel et al., 2017).

## RESULTS

EMA at the hip and ankle declined with significant negative allometry in *S. floridanus*, whereas knee EMA remained unchanged (i.e. was not significantly associated with body mass) (Table 3, Fig. 2A–C,E–G). Given that EMA declined at two of the three joints examined, total hindlimb EMA also significantly declined with increasing body size, the reverse of scaling patterns previously observed in interspecific studies of adult mammals of varying body size (Fig. 2D,H). Controlling for variation in body mass, increasing acceleration decreased hip EMA, increased knee EMA and had no significant effect on EMA at the ankle or total hindlimb EMA (Table 3).

**Table 4. Ontogenetic allometry of muscle lever arms ( $r$ ), ground reaction force (GRF) load arms ( $R$ ) and distal segment lengths in *S. floridanus***

| Model          | Slope* [95% CI]            | $P$    | $R^2$ | Scaling pattern |
|----------------|----------------------------|--------|-------|-----------------|
| <b>Hip</b>     |                            |        |       |                 |
| Mean hip $r$   | <b>0.36</b> [0.252, 0.518] | <0.001 | 0.693 | Isometric       |
| Mean hip $R$   | <b>0.71</b> [0.513, 0.975] | <0.001 | 0.785 | Positive        |
| Thigh length   | 0.46 [0.353, 0.605]        | <0.001 | 0.832 | Positive        |
| <b>Knee</b>    |                            |        |       |                 |
| Mean knee $r$  | <b>0.23</b> [0.148, 0.347] | 0.003  | 0.561 | Isometric       |
| Mean knee $R$  | <b>0.62</b> [0.357, 1.092] | 0.07   | 0.301 | Positive        |
| Leg length     | <b>0.46</b> [0.380, 0.551] | <0.001 | 0.921 | Positive        |
| <b>Ankle</b>   |                            |        |       |                 |
| Mean ankle $r$ | <b>0.32</b> [0.250, 0.415] | <0.001 | 0.850 | Isometric       |
| Mean ankle $R$ | <b>0.59</b> [0.480, 0.719] | <0.001 | 0.906 | Positive        |
| Foot length    | <b>0.27</b> [0.200, 0.363] | <0.001 | 0.792 | Isometric       |

\*Regression slopes were calculated from Model II (reduced major axis) log–log regression on body mass.

Any regression model including the isometric prediction of 0.33 in the 95% confidence interval around the calculated slope was deemed isometric. Regression slopes significantly above or below 0.33 were deemed positive or negative allometry, respectively. Bold values indicate significant regression coefficients.

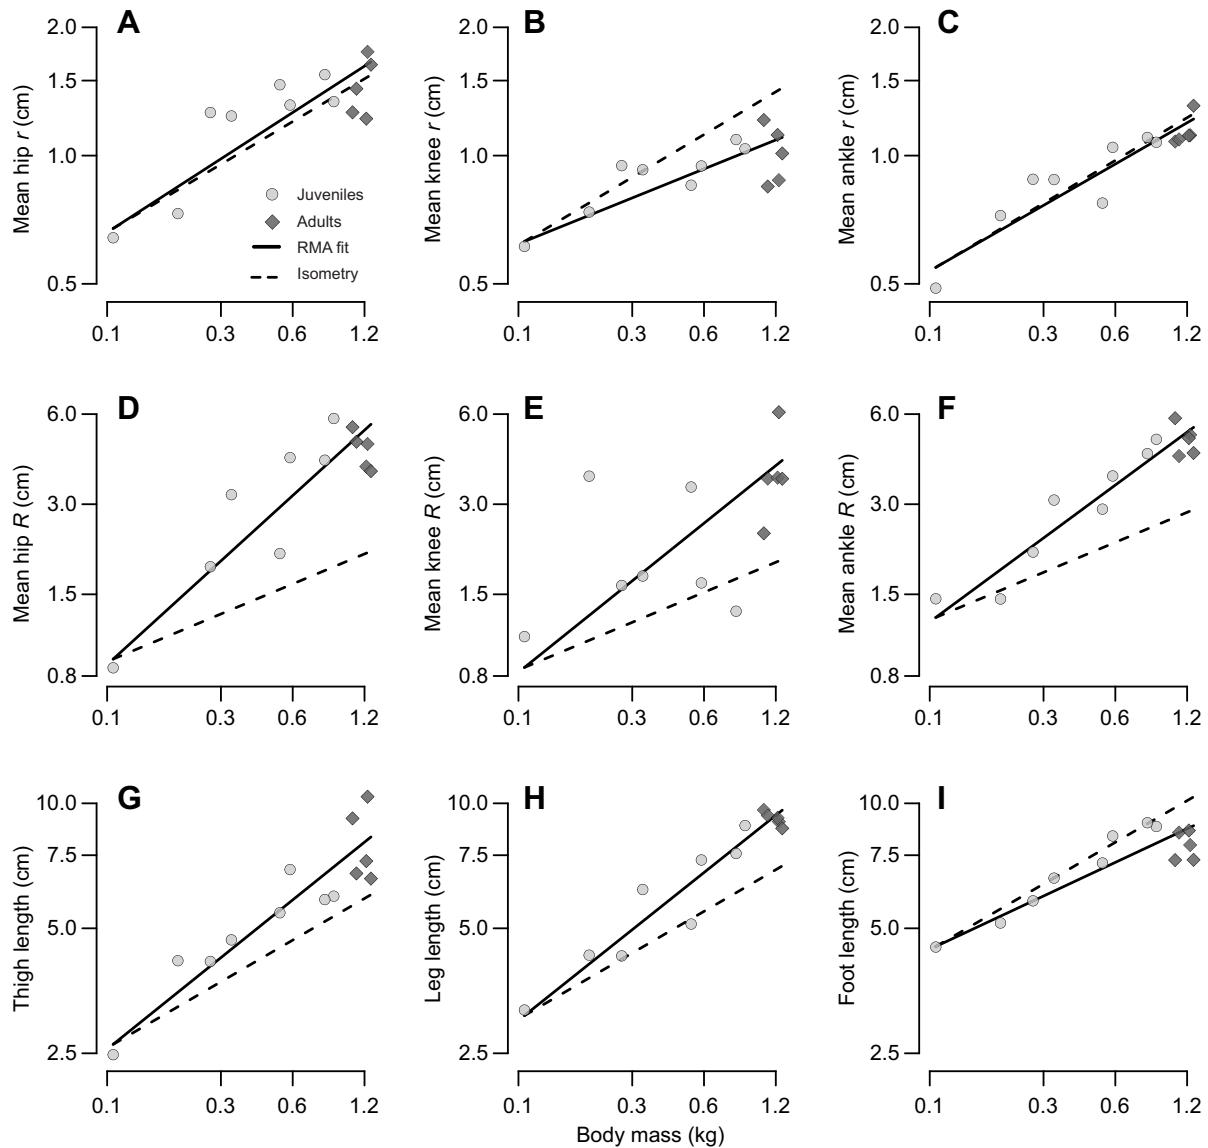

**Fig. 3. Ontogenetic scaling in *S. floridanus*.** (A–C) Muscle lever arm lengths ( $r$ ), (D–F) ground reaction force load arm lengths ( $R$ ) and (G–I) hindlimb segment lengths. Data are plotted on logarithmic axes. Data points represent individual rabbits (i.e. eight juveniles and five adults). Solid trend lines represent mixed-effects linear fits specifying individual rabbits as a random factor in the analysis (RMA, reduced major axis). Dashed lines indicate the predicted scaling relationship under isometry.

As detailed above (see Fig. 1), EMA can be increased via longer  $r$  or shorter  $R$ . Therefore, an ontogenetic decrease in EMA implied negative allometry of  $r$  (i.e. greater values in younger animals), positive allometry of  $R$  (greater values in older animals) or a combination of these scaling trends. Values of  $r$  scaled with positive allometry at hip and negative allometry at the knee and ankle joints (Table 4, Fig. 3A–C), though the 95% confidence intervals about these slopes included the isometric expectation of 0.33 in each case. Inversely,  $R$  scaled with significant positive allometry at each joint (i.e. the 95% confidence intervals did not include isometry; Table 4, Fig. 4D–F). We also examined the ontogenetic scaling of distal limb length (i.e. thigh length at the hip, leg length at the knee and foot length at the ankle; see Table 1 for segment definitions) as a possible determinant of ontogenetic changes in  $R$  (see below). Thigh and leg length scaled with positive allometry, whereas foot length scaled with slight negative allometry (and the 95% confidence intervals included isometry; Table 4, Fig. 3G–I).

Because  $R$  is defined as the perpendicular distance between the GRF vector and the joint center of rotation, its magnitude can vary as a function of joint angle, GRF orientation or limb length distal to the joint (Biewener, 1989; Polk, 2002; Young, 2009). Multiple mixed-effects regression models indicated that  $R$  was positively associated with distal limb length, though the relationship was only significant at the hip and ankle joints (Table 5). Neither average joint angle nor  $\theta_{\text{GRF}}$  were significantly associated with variation in  $R$  at any of the joints analyzed.

Mean hindlimb extensor muscle fascicle length (i.e.  $L_{\text{mean}}$ ) of the hindlimb extensors scaled with positive ontogenetic allometry in *S. floridanus*, though the 95% confidence interval on the estimate included isometry [slope (95% CI)=0.48 (0.303, 0.749),  $R^2=0.50$ ,  $P=0.007$ ]. Active muscle volume ( $V_{\text{muscle}}$ ) increased with body mass and, when controlling for body mass, decreased with increasing total hindlimb EMA (Table 6). Mean acceleration was not independently associated with  $V_{\text{muscle}}$ .

## DISCUSSION

Our hypotheses were generally supported by our analyses. EMA at the hip and ankle joints, as well as in the hindlimb overall, significantly declined during *S. floridanus* ontogeny. Lack of significant change in knee EMA is likely due to the position of the knee joint relative to the GRF vector. Given that our locomotor dataset explicitly sampled acceleration, the average GRF vector had a net cranial orientation (mean $\pm$ 95% CI=67 $\pm$ 6.9 deg), indicative of the net propulsive function of the hindlimbs during the support phase. As a result, the GRF vector typically passed very near the knee joint, falling slightly cranial or slightly caudal to the joint throughout the support phase. The variable position of the GRF with respect to the knee resulted in highly variable GRF load arm lengths at the knee joint (see Fig. 3E), highly variable EMA ratios, and

therefore no evidence of consistent ontogenetic change in knee joint EMA. The variable position of the GRF vector relative to the hip and knee joints also accounts for observed effects of acceleration on EMA at these joints. At greater accelerations, the average GRF vector tilted cranially, increasing *R* at the hip joint but decreasing *R* at the knee joint, resulting in a negative correlation between acceleration and hip joint EMA and a positive correlation between acceleration and knee joint EMA.

Overall, our results are consistent with previous research documenting negative allometry of anatomical mechanical advantage (i.e. bony muscle lever arm length scaled to skeletal limb length below the joint) in other mammalian taxa (e.g. jackrabbits, Carrier, 1983; capuchin monkeys, Young, 2005), with attendant benefits for juvenile locomotor performance (Carrier,

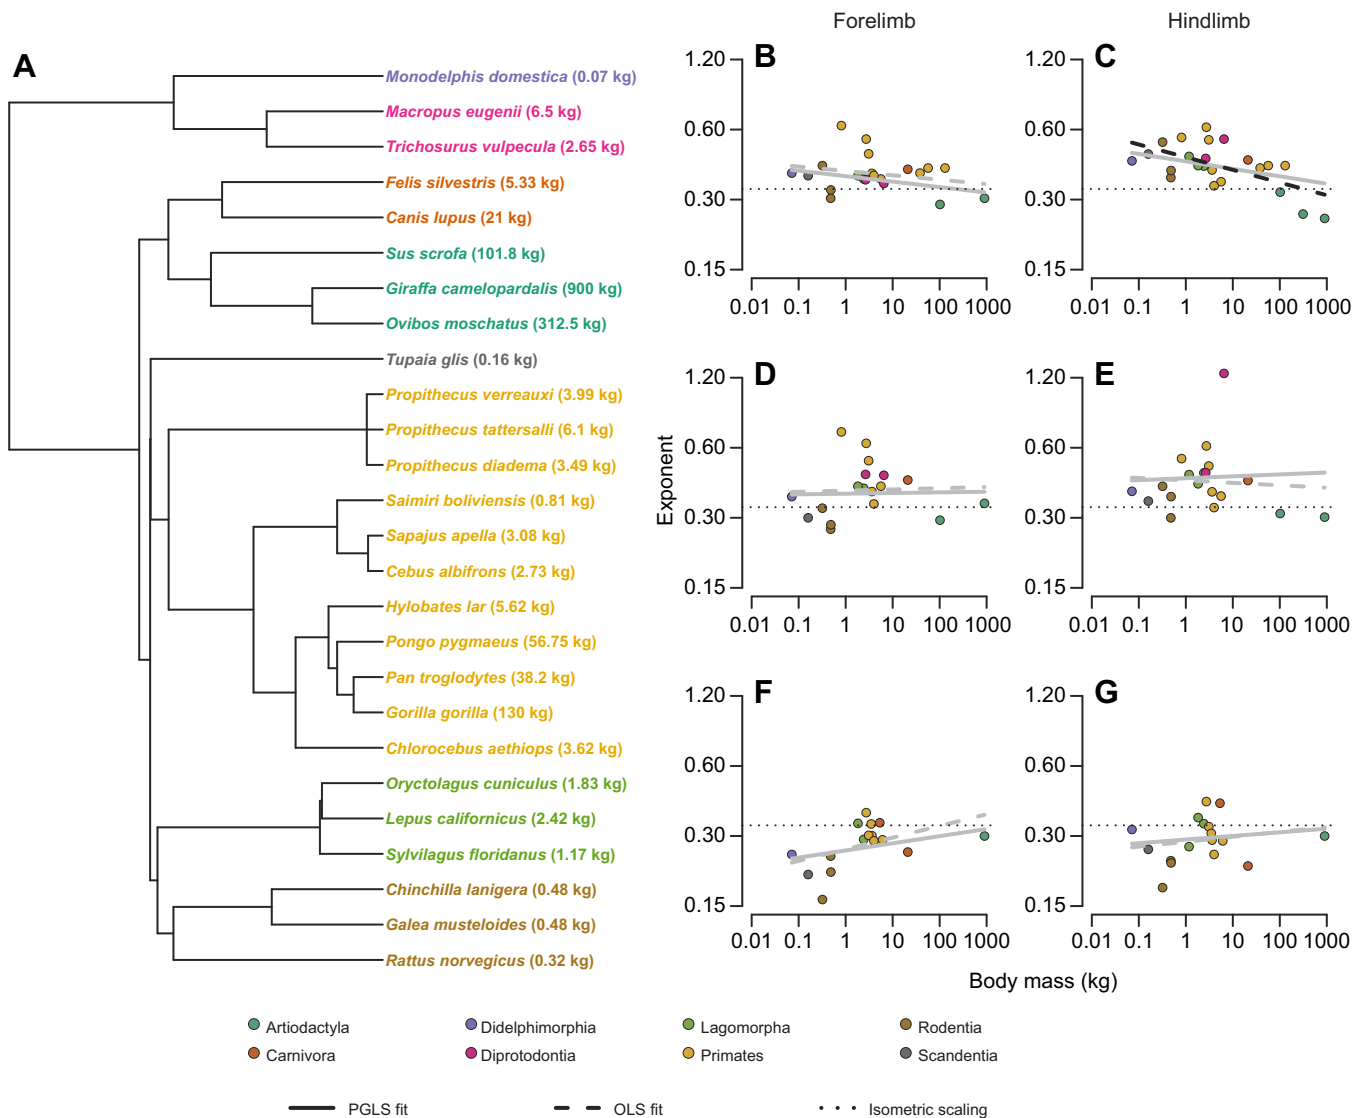

**Fig. 4. Size-related variation in limb growth allometry across terrestrial mammals.** (A) Chronogram of species included in our analyses (sampled from Bininda-Emonds et al., 2007). Branch lengths are proportion to millions of years since time of divergence. Species labels are colored according to taxonomic order, as listed in the key. Our interspecific sample encompasses more than six orders of magnitude in body mass variation (average adult body mass for each species is indicated next to each binomen). Scatterplots illustrate size-associated variation in ontogenetic scaling exponents in proximal elements (B: humerus/arm; C: femur/thigh), middle elements (D: radius/forearm; E: tibia/leg) and distal elements (F: third metacarpal/hand; G: third metacarpal/foot). Data are plotted on logarithmic axes. The horizontal dashed line indicates isometric scaling (slope=0.33). Gray shading indicates that the trend line is not significant. Data sources for scaling exponents: Jungers and Fleagle (1980); Carrier (1983); Ravosa et al. (1993); Turner et al. (1997); Lawler (2006); Schilling and Petrovitch (2006); Helmsmüller et al. (2013); van Sittert et al. (2015); present study. Adult body mass was taken from either the original studies or Nowak (1991) if not available otherwise.



**Table 5. Multiple regression models of variation in GRF load arm lengths across the ontogenetic *S. floridanus* dataset**

| Model                 | $\beta$      | Statistic        | <i>P</i> | <i>R</i> <sup>2</sup> |
|-----------------------|--------------|------------------|----------|-----------------------|
| Mean hip <i>R</i>     |              |                  |          | 0.245                 |
| Mean hip angle        | 0.127        | $F_{1,45}=1.1$   | 0.309    |                       |
| Thigh length          | <b>0.598</b> | $F_{1,7}=7.9$    | 0.026    |                       |
| $\theta_{\text{GRF}}$ | -0.065       | $F_{1,45}=0.25$  | 0.622    |                       |
| Mean knee <i>R</i>    |              |                  |          | 0.071                 |
| Mean knee angle       | -0.031       | $F_{1,59}=0.038$ | 0.846    |                       |
| Leg length            | 0.211        | $F_{1,10}=1.4$   | 0.256    |                       |
| $\theta_{\text{GRF}}$ | 0.198        | $F_{1,59}=3.1$   | 0.086    |                       |
| Mean ankle <i>R</i>   |              |                  |          | 0.371                 |
| Mean ankle angle      | 0.179        | $F_{1,81}=2.8$   | 0.099    |                       |
| Foot length           | <b>0.729</b> | $F_{1,11}=14.9$  | 0.003    |                       |
| $\theta_{\text{GRF}}$ | -0.119       | $F_{1,81}=2.1$   | 0.149    |                       |

\*Bold values indicate significant partial regression coefficients (i.e.  $\beta$  weights).

1995). Given the combination of morphometric, kinematic and kinetic data required, EMA has only been measured in a small sample of adult animals (Biewener, 1989; Carrier et al., 1998; Blob and Biewener, 2001; Polk, 2002; Biewener et al., 2004), and we are aware of only one other study (Smith and Wilson, 2013) that has attempted to evaluate EMA across ontogeny. Smith and Wilson (2013) measured overall hindlimb EMA in growing ostriches (*Struthio camelus*) over the first 10 months of life (during which time body mass increased from 5 to 75 kg), finding no consistent changes in mean hindlimb EMA with increasing size (although the lowest EMA was observed in largest ostriches; their fig. 4). Discrepancies in the ontogenetic trajectory of EMA between cottontail rabbits and ostriches could be due to several factors, principally (1) differences between avian and mammalian limb anatomy and posture (Gatesy and Pollard, 2011) and (2) differences in overall body size. As the largest extant birds, adult ostriches would require high EMA to overcome the geometric limits on muscle force and bone bending strength faced by all terrestrial organisms (Biewener, 1989, 1990, 1991; Gatesy, 1991; Reilly et al., 2007). It could also be that the apparent lack of size-related change observed in the Smith and Wilson (2013) study arose from assumptions made during their analyses. Specifically, rather than calculate *r* at each age, they assumed that lever arms scaled proportionally to segment lengths, using allometric equations from their previous studies of ostrich growth and musculoskeletal anatomy (Smith et al., 2007, 2010). Because *R* also closely tracked segment length during ostrich growth (Smith and Wilson, 2013), it may be that constant EMA values during ontogeny arise from calculating a ratio of two values that fundamentally track the same dimension.

Declining EMA in the hindlimb of *S. floridanus* during growth resulted from isometric ontogenetic scaling of muscle lever arm lengths combined with positive ontogenetic allometry of GRF moment arm lengths. In other words, the denominator of EMA (see Eqn 2) increased with body size, resulting in increasingly smaller ratios as animals grew. This is the reverse of the pattern observed in

**Table 6. Multiple regression model of variation in the volume of active muscle ( $V_{\text{muscle}}$ ) across the ontogenetic *S. floridanus* dataset**

| Predictor variable    | $\beta$       | Statistic       | <i>P</i> | <i>R</i> <sup>2</sup> |
|-----------------------|---------------|-----------------|----------|-----------------------|
| Body mass             | <b>0.779</b>  | $F_{1,9}=14.5$  | 0.004    | 0.497                 |
| Total hindlimb EMA    | <b>-0.104</b> | $F_{1,49}=10.4$ | 0.002    |                       |
| Mean $a_{\text{CoM}}$ | -0.014        | $F_{1,49}=0.53$ | 0.517    |                       |

Bold values indicate significant partial regression coefficients (i.e.  $\beta$  weights).

interspecific studies of adult mammals of varying body size, where size-related increases in EMA result from the negative allometry of *R* (in this case, principally due to the tendency of larger animals to stand and move with more extended limb postures) (Biewener, 1989, 1990, 1991; Gatesy, 1991; Reilly et al., 2007; but see Ren et al., 2010). Comparison of observed values with predictions using published scaling equations of adult mammals (Biewener, 1989, 1990; Biewener et al., 2004) specifically show that young *S. floridanus* have much greater hindlimb EMA than predicted for a generalized mammal of their size, whereas EMA in adult *S. floridanus* more closely aligns with predicted values (Fig. 2H). As such, EMA may represent an example of size-related allometric changes during ontogeny inversely mirroring those observed in interspecific studies. The ontogeny of long bone cross-sectional robusticity represents another example of this trend. Young animals typically have geometrically more robust bones than their adult counterparts, resulting in negative ontogenetic allometry of second moments of area, section moduli and other geometric correlates of bone strength (e.g. Carrier, 1983; Currey, 1984; Brear et al., 1990; Carrier and Leon, 1990; Heinrich et al., 1999; Currey, 2001; Lammers and German, 2002; Ruff, 2003; Main and Biewener, 2004; Main and Biewener, 2007; Young et al., 2010; Russo and Young, 2011; Kilbourne and Makovicky, 2012; Patel et al., 2017), whereas geometric measures of bone strength increase with positive allometry across the size range of extant mammals (Alexander et al., 1979).

Future work should seek to characterize ontogenetic changes in EMA in other terrestrial animals, particularly given the differing findings of this study and Smith and Wilson (2013). It may be possible to make inferences about the ontogenetic scaling of EMA in other mammals by studying the ontogenetic allometry of limb bone lengths. In our study, we found that distal limb length was the best predictor of *R* across the ontogenetic *S. floridanus* dataset, with positive allometry of limb lengths generally leading to positive allometry of GRF load lengths. Young (2009) and Smith and Wilson (2013) made similar observations with respect to growing squirrel monkeys (*Saimiri boliviensis*) and ostriches, respectively. In fact, an examination of scaling exponents from allometric studies of limb growth in 26 mammal species spanning six orders of magnitude in body mass supports the prediction that positive allometry of limb bone lengths – and, by extension, GRF load arm lengths – is characteristic of mammalian ontogeny (Fig. 4). Specifically, proximal and middle limb segments (i.e. brachium/thigh and antebrachium/crus) generally scale with positive allometry (proximal: 81–87% of taxa; middle: 72–79% of taxa; Fig. 4B–E), whereas distal segments (i.e. manus/pes) generally scale with negative allometry (75–77% of taxa; Fig. 4F,G). Scaling exponents for the proximal segments tend to decrease with increasing body mass, whereas those for distal segments tend to increase with body mass, though most of these trends were not statistically significant, particularly when analyzed in a comparative framework using phylogenetic generalized least squares regression. Overall, these data suggest that, in general, young mammals are characterized by relatively short limbs for their size, though distal segments tend to be relatively long early in life (see also Jungers and Fleagle, 1980; Young and Heard-Booth, 2016; Druelle et al., 2018; Young et al., 2019). Inasmuch as distal limb length determines *R*, ontogenetic declines in muscle leverage may also be characteristic of mammals in general.

What might be the functional consequences of ontogenetic declines in EMA? We found that greater hindlimb extensor EMA significantly decreased the estimated muscle volume required to be

activated during locomotion in young *S. floridanus*. Because active muscle volume is directly proportional to metabolic cost (Roberts et al., 1998; Biewener et al., 2004; Pontzer et al., 2008), this finding suggests that burst locomotion may have been energetically more efficient in young cottontail rabbits. Mitigating the energetic cost of locomotion would allow young rabbits to shunt more energy to tissue growth and differentiation, accelerating growth and ultimately limiting the time that must be spent in the ecologically risky state inherent to being a small-bodied juvenile (Williams, 1966; Werner and Gillam, 1984; Janson and van Schaik, 1993; Carrier, 1996; Arendt and Reznick, 2005; Herrel and Gibb, 2006). Additionally, greater EMA necessarily reduces the muscular forces that the skeleton must withstand during locomotion, perhaps increasing limb bone safety factors in young rabbits (Biewener, 1989; Main and Biewener, 2004). Similarly, by increasing the output forces resulting from a given muscle contraction, greater extensor muscle EMA may facilitate heightened acceleration capacity in juvenile *S. floridanus*, a fitness-critical performance metric during predator evasion (Carrier, 1983, 1995; Walker et al., 2005). Overall, the findings of this study strongly suggest that allometric growth trajectories, and resulting performance capacities, are indicative of adaptive processes acting on juveniles and not just adults (Carrier, 1996).

#### Acknowledgements

The authors wish to thank Christine Craycroft and the Portage Park District for permission to use the Breakneck Creek Field Station for the duration of this study. We also thank Summit Metro Parks, the University of Akron, and multiple private landowners in Portage, Summit and Columbiana counties, Ohio, USA, for permission to trap rabbits on their properties. Many high school, undergraduate, graduate and medical students contributed to data collection and processing, including: E. Barkette, B. Barnette, K. Burns, B. Crawford, F. Galloway, Z. Glenn, E. Grubb, S. Hamrick, B. Herbert, E. Kuntzler, A. Metz, E. Moreland, K. Reardon, J. Rose, J. Rupert, M. Slavens, N. Tatirovich, A. Thakore and D. Thomas. Connie Fellmann provided valuable discussion and assistance during the initial planning phases of this work. We thank the two external reviewers and the editor for their valuable comments on an earlier version of this manuscript.

#### Competing interests

The authors declare no competing or financial interests.

#### Author contributions

Conceptualization: M.T.B., G.A.S., J.W.Y.; Methodology: M.T.B., G.A.S., J.W.Y.; Software: J.W.Y.; Formal analysis: M.T.B., J.W.Y.; Investigation: A.D.F., M.T.B., G.A.S., G.A.R., R.T., J.W.Y.; Resources: M.T.B., G.A.S., J.W.Y.; Data curation: M.T.B., J.W.Y.; Writing - original draft: A.D.F., J.W.Y.; Writing - review & editing: A.D.F., M.T.B., G.A.S., G.A.R., J.W.Y.; Supervision: M.T.B., G.A.S., J.W.Y.; Project administration: M.T.B., G.A.S., J.W.Y.; Funding acquisition: M.T.B., G.A.S., J.W.Y.

#### Funding

Funded by a collaborative grant from the National Science Foundation (IOS-1146916, IOS-1147044, IOS-1146851 and IOS-1502804 to J.W.Y., M.T.B. and G.A.S.). Additional funding was provided by the Department of Anatomy and Neurobiology at Northeast Ohio Medical University, and the Department of Biological Sciences and College of STEM at Youngstown State University.

#### Data availability

Data used in the analyses presented here can be downloaded from figshare at: <https://figshare.com/s/3724c1c7cf7c05e57a59>.

#### References

Adams, L. G., Singer, F. J. and Dale, B. W. (1995). Caribou calf mortality in Denali National Park, Alaska. *J. Wildl. Manag.* **59**, 584-594. doi:10.2307/3802467

Alexander, R. M. N., Jayes, A. S., Maloio, G. M. O. and Wathuta, E. M. (1979). Allometry of limb bones of mammals from shrews (*Sorex*) to elephant (*Loxodonta*). *J. Zool.* **189**, 305-314. doi:10.1111/j.1469-7998.1979.tb03964.x

Arendt, J. D. and Reznick, D. N. (2005). Evolution of juvenile growth rates in female guppies (*Poecilia reticulata*): predator regime or resource level? *Proc. R. Soc. B Biol. Sci.* **272**, 333-337. doi:10.1098/rspb.2004.2899

Biewener, A. A. (1989). Scaling body support in mammals: limb posture and muscle mechanics. *Science* **245**, 45-48. doi:10.1126/science.2740914

Biewener, A. A. (1990). Biomechanics of mammalian terrestrial locomotion. *Science* **250**, 1097-1103. doi:10.1126/science.2251499

Biewener, A. A. (1991). Musculoskeletal design in relation to body size. *J. Biomech.* **24**, 19-29. doi:10.1016/0021-9290(91)90374-V

Biewener, A. A. and Full, R. J. (1992). Force platform and kinematic analysis. In *Biomechanics: Structures and Systems* (ed. A. A. Biewener), pp. 45-73. Oxford: Oxford University Press.

Biewener, A. A., Farley, C. T., Roberts, T. J. and Temaner, M. (2004). Muscle mechanical advantage of human walking and running: implications for energy cost. *J. Appl. Physiol.* **97**, 2266-2274. doi:10.1152/japplphysiol.00003.2004

Bininda-Emonds, O. R. P., Cardillo, M., Jones, K. E., MacPhee, R. D. E., Beck, R. M. D., Grenyer, R., Price, S. A., Vos, R. A., Gittleman, J. L. and Purvis, A. (2007). The delayed rise of present-day mammals. *Nature* **446**, 507-512. doi:10.1038/nature05634

Blob, R. W. and Biewener, A. A. (2001). Mechanics of limb bone loading during terrestrial locomotion in the green iguana (*Iguana iguana*) and American alligator (*Alligator mississippiensis*). *J. Exp. Biol.* **204**, 1099-1122.

Box, G. E. P. and Cox, D. R. (1964). An analysis of transformations. *J. R. Stat. Soc. B* **26**, 211-243. doi:10.1111/j.2517-6161.1964.tb00553.x

Brear, K., Currey, J. D. and Pond, C. M. (1990). Ontogenetic changes in the mechanical properties of the femur of the polar bear, *Ursus maritimus*. *J. Zool.* **222**, 49-58. doi:10.1111/j.1469-7998.1990.tb04028.x

Butcher, M. T., Chase, P. B., Hermanson, J. W., Clark, A. N., Brunet, N. M. and Bertram, J. E. A. (2010). Contractile properties of muscle fibers from the forelimb deep and superficial digital flexors of horses. *Am. J. Physiol.* **299**, R996-R1005. doi:10.1152/ajpregu.00510.2009

Butcher, M. T., Rose, J. A., Glenn, Z. D., Tatirovich, N. M., Russo, G. A., Foster, A. D., Smith, G. A. and Young, J. W. (2019). Ontogenetic allometry and architectural properties of the paravertebral and hindlimb musculature in Eastern cottontail rabbits (*Sylvilagus floridanus*). *J. Anat.* **235**, 106-123. doi:10.1111/joa.12991

Carrier, D. R. (1983). Postnatal ontogeny of the musculo-skeletal system in the Black-tailed jack rabbit (*Lepus californicus*). *J. Zool.* **201**, 27-55. doi:10.1111/j.1469-7998.1983.tb04259.x

Carrier, D. R. (1995). Ontogeny of jumping performance in the black-tailed jackrabbit (*Lepus californicus*). *Zoology* **98**, 309-313.

Carrier, D. R. (1996). Ontogenetic limits on locomotor performance. *Physiol. Zool.* **69**, 467-488. doi:10.1086/physzool.69.3.30164211

Carrier, D. R. and Leon, L. R. (1990). Skeletal growth and function in the California gull (*Larus californicus*). *J. Zool.* **222**, 375-389. doi:10.1111/j.1469-7998.1990.tb04039.x

Carrier, D. R., Gregersen, C. S. and Silverton, N. A. (1998). Dynamic gearing in running dogs. *J. Exp. Biol.* **201**, 3185-3195.

Case, T. J. (1978). On the evolution and adaptive significance of postnatal growth rates in terrestrial vertebrates. *Q. Rev. Biol.* **53**, 243-282. doi:10.1086/410622

Currey, J. (1984). *The Mechanical Adaptation of Bones*. Princeton, NJ: Princeton University Press.

Currey, J. D. (2001). Ontogenetic changes in compact bone mineral properties. In *Bone Mechanics Handbook* (ed. S. C. Cowin), pp. 19.1-19.16. Boca Raton, FL: CRC Press.

Druelle, F., Young, J. and Berillon, G. (2018). Behavioral implications of ontogenetic changes in intrinsic hand and foot proportions in olive baboons (*Papio anubis*). *Am. J. Phys. Anthropol.* **165**, 65-76. doi:10.1002/ajpa.23331

Dutto, D. J. (2004). Moments and power generated by the horse (*Equus caballus*) hind limb during jumping. *J. Exp. Biol.* **207**, 667-674. doi:10.1242/jeb.00808

Gatesy, S. M. (1991). Bipedal locomotion: effects of speed, size and limb posture in birds and humans. *J. Zool.* **224**, 127-147. <https://doi.org/10.1111/j.1469-7998.1991.tb04794.x>

Gatesy, S. M. and Pollard, N. S. (2011). Apples, oranges, and angles: comparative kinematic analysis of disparate limbs. *J. Theor. Biol.* **282**, 7-13. doi:10.1016/j.jtbi.2011.05.009

Gray, J. (1944). Studies in the mechanics of the tetrapod skeleton. *J. Exp. Biol.* **20**, 88-116.

Gray, J. (1968). *Animal Locomotion*. New York: Norton.

Hale, J. B. (1949). Aging cottontail rabbits by bone growth. *J. Wildl. Manag.* **13**, 216-225. doi:10.2307/3796090

Hedrick, T. L. (2008). Software techniques for two- and three-dimensional kinematic measurements of biological and biomimetic systems. *Bioinspir. Biomim.* **3**, 034001. doi:10.1088/1748-3182/3/3/034001

Heinrich, R. E., Ruff, C. B. and Adamczewski, J. Z. (1999). Ontogenetic changes in mineralization and bone geometry in the femur of muskoxen (*Ovibos moschatus*). *J. Zool.* **247**, 215-223. doi:10.1111/j.1469-7998.1999.tb00985.x

Helmsmüller, D., Wefstaedt, P., Nolte, I. and Schilling, N. (2013). Ontogenetic allometry of the Beagle. *BMC Vet. Res.* **9**, 203. doi:10.1186/1746-6148-9-203

Herrel, A. and Gibb, A. C. (2006). Ontogeny of performance in vertebrates. *Physiol. Biochem. Zool.* **79**, 1-6. doi:10.1086/498196

Hildebrand, M. (1977). Analysis of asymmetrical gaits. *J. Mammal.* **58**, 131-156. doi:10.2307/1379571

- Janson, C. H. and van Schaik, C. P.** (1993). Ecological risk aversion in juvenile primates: slow and steady wins the race. In *Juvenile Primates: Life History, Development, and Behavior* (ed. M. E. Pereira and L. A. Fairbanks), pp. 57-74. Oxford and New York: Oxford University Press.
- Johnson, P. C. D.** (2014). Extension of Nakagawa & Schielzeth's R<sup>2</sup>GLMM to random slopes models. *Methods Ecol. Evol.* **5**, 944-946. doi:10.1111/2041-210X.12225
- Jungers, W. L. and Fleagle, J. G.** (1980). Postnatal growth allometry of the extremities in *Cebus albifrons* and *Cebus apella*: a longitudinal and comparative study. *Am. J. Phys. Anthropol.* **53**, 471-478. doi:10.1002/ajpa.1330530403
- Kilbourne, B. M. and Makovicky, P. J.** (2012). Postnatal long bone growth in terrestrial placental mammals: allometry, life history, and organismal traits. *J. Morphol.* **273**, 1111-1126. doi:10.1002/jmor.20048
- Lammers, A. R. and German, R. Z.** (2002). Ontogenetic allometry in the locomotor skeleton of specialized half-bounding mammals. *J. Zool.* **258**, 485-495. doi:10.1017/S0952836902001644
- Lawler, R. R.** (2006). Sifaka positional behavior: ontogenetic and quantitative genetic approaches. *Am. J. Phys. Anthropol.* **131**, 261-271. doi:10.1002/ajpa.20430
- Lee, D. V.** (2011). Effects of grade and mass distribution on the mechanics of trotting in dogs. *J. Exp. Biol.* **214**, 402-411. doi:10.1242/jeb.044487
- Lord, R. D., Jr** (1963). *The Cottontail Rabbit in Illinois*. Carbondale, IL: Southern Illinois University Press.
- Main, R. P. and Biewener, A. A.** (2004). Ontogenetic patterns of limb loading, *in vivo* bone strains and growth in the goat radius. *J. Exp. Biol.* **207**, 2577-2588. doi:10.1242/jeb.01065
- Main, R. P. and Biewener, A. A.** (2007). Skeletal strain patterns and growth in the emu hindlimb during ontogeny. *J. Exp. Biol.* **210**, 2676-2690. doi:10.1242/jeb.004580
- McGowan, C. P.** (2005). Joint work and power associated with acceleration and deceleration in tammar wallabies (*Macropus eugenii*). *J. Exp. Biol.* **208**, 41-53. doi:10.1242/jeb.01305
- Méndez, J. and Keys, A.** (1960). Density and composition of mammalian muscle. *Metabolism* **9**, 184-188.
- Nowak, R. G.** (1991). *Walker's Mammals of the World*. Baltimore: Johns Hopkins University Press.
- Patel, B. A., Organ, J. M., Jashashvili, T., Bui, S. H. and Dunsworth, H. M.** (2017). Ontogeny of hallux metatarsal rigidity and shape in the rhesus monkey (*Macaca mulatta*) and chimpanzee (*Pan troglodytes*). *J. Anat.* **29**, 391-315. doi:10.1111/joa.12720
- Pinheiro, J. C. and Bates, D. M.** (2000). *Mixed-Effects Models in S and S-PLUS*. New York, NY: Springer.
- Polk, J. D.** (2002). Adaptive and phylogenetic influences on musculoskeletal design in cercopithecine primates. *J. Exp. Biol.* **205**, 3399-3412.
- Pontzer, H., Raichlen, D. A. and Sockol, M. D.** (2008). The metabolic cost of walking in humans, chimpanzees, and early hominins. *J. Hum. Evol.* **56**, 43-54. doi:10.1016/j.jhevol.2008.09.001
- Promislow, D. E. L. and Harvey, P. H.** (1990). Living fast and dying young: a comparative analysis of life-history variation among mammals. *J. Zool.* **220**, 417-437. doi:10.1111/j.1469-7998.1990.tb04316.x
- Ravosa, M. J., Meyers, D. M. and Glander, K. E.** (1993). Relative growth of the limbs and trunk in sifakas – heterochronic, ecological, and functional considerations. *Am. J. Phys. Anthropol.* **92**, 499-520. doi:10.1002/ajpa.1330920408
- Reilly, S. M., McElroy, E. J. and Biknevicius, A. R.** (2007). Posture, gait and the ecological relevance of locomotor costs and energy-saving mechanisms in tetrapods. *Zoology* **104**, 271-289. doi:10.1016/j.zool.2007.01.003
- Ren, L., Miller, C. E., Lair, R. and Hutchinson, J. R.** (2010). Integration of biomechanical compliance, leverage, and power in elephant limbs. *Proc. Natl Acad. Sci. USA* **107**, 7078-7082. doi:10.1073/pnas.0911396107
- Roberts, T. J. and Scales, J. A.** (2002). Mechanical power output during running accelerations in wild turkeys. *J. Exp. Biol.* **205**, 1485-1494.
- Roberts, T. J., Chen, M. S. and Taylor, C. R.** (1998). Energetics of bipedal running. II. Limb design and running mechanics. *J. Exp. Biol.* **201**, 2753-2762.
- Ruff, C. B.** (2003). Ontogenetic adaptation to bipedalism: age changes in femoral to humeral length and strength proportions in humans, with a comparison to baboons. *J. Hum. Evol.* **45**, 317-349. doi:10.1016/j.jhevol.2003.08.006
- Russo, G. A. and Young, J. W.** (2011). Tail growth tracks the ontogeny of prehensile tail use in capuchin monkeys (*Cebus albifrons* and *C. apella*). *Am. J. Phys. Anthropol.* **146**, 465-473. doi:10.1002/ajpa.21617
- Sacks, R. D. and Roy, R. R.** (1982). Architecture of hind limb muscles of cats: functional significance. *J. Morphol.* **173**, 185-195. doi:10.1002/jmor.1051730206
- Schilling, N. and Petrovitch, A.** (2006). Postnatal allometry of the skeleton in *Tupaia glis* (Scandentia: Tupaiidae) and *Galea musteloides* (Rodentia: Caviidae) - a test of the three-segment limb hypothesis. *Zoology* **109**, 148-162. doi:10.1016/j.zool.2005.11.004
- Smith, J. M. and Savage, R. J. G.** (1956). Some locomotory adaptations in mammals. *Zool. J. Linn. Soc.* **42**, 603-622. doi:10.1111/j.1096-3642.1956.tb02220.x
- Smith, N. C. and Wilson, A. M.** (2013). Mechanical and energetic scaling relationships of running gait through ontogeny in the ostrich (*Struthio camelus*). *J. Exp. Biol.* **216**, 841-849. doi:10.1242/jeb.064691
- Smith, N. C., Payne, R. C., Jespers, K. J. and Wilson, A. M.** (2007). Muscle moment arms of pelvic limb muscles of the ostrich (*Struthio camelus*). *J. Anat.* **211**, 313-324. doi:10.1111/j.1469-7580.2007.00762.x
- Smith, N. C., Jespers, K. J. and Wilson, A. M.** (2010). Ontogenetic scaling of locomotor kinetics and kinematics of the ostrich (*Struthio camelus*). *J. Exp. Biol.* **213**, 1347-1355. doi:10.1242/jeb.020271
- Sokal, R. R. and Rohlf, F. J.** (1995). *Biometry*. New York: W.H. Freeman.
- Stoffel, M. A., Nakagawa, S. and Schielzeth, H.** (2017). rptR: repeatability estimation and variance decomposition by generalized linear mixed effects models. *Methods Ecol. Evol.* **8**, 1639-1644. doi:10.1111/2041-210X.12797
- Turner, T. R., Anapol, F. and Jolly, C. J.** (1997). Growth, development, and sexual dimorphism in vervet monkeys (*Cercopithecus aethiops*) at four sites in Kenya. *Am. J. Phys. Anthropol.* **103**, 19-35. doi:10.1002/(SICI)1096-8644(199705)103:1<19::AID-AJPA3>3.0.CO;2-8
- van Sittert, S., Skinner, J. and Mitchell, G.** (2015). Scaling of the appendicular skeleton of the giraffe (*Giraffa camelopardalis*). *J. Morphol.* **276**, 503-516. doi:10.1002/jmor.20358
- Venables, W. N. and Ripley, B. D.** (2002). *Modern Applied Statistics with S*. New York: Springer.
- Walker, J. A.** (1998). Estimating velocities and accelerations of animal locomotion: a simulation experiment comparing numerical differentiation algorithms. *J. Exp. Biol.* **201**, 981-995.
- Walker, J. A., Ghalambor, C. K., Griset, O. L., McKenney, D. and Reznick, D. N.** (2005). Do faster starts increase the probability of evading predators? *Funct. Ecol.* **19**, 808-815. doi:10.1111/j.1365-2435.2005.01033.x
- Wells, R. P.** (1981). The projection of the ground reaction force as a predictor of internal joint moments. *Bull. Prosthet. Res.* **18**, 15-19.
- Werner, E. E. and Gillam, J. F.** (1984). The ontogenetic niche and species interactions in size-structured populations. *Annu. Rev. Ecol. Syst.* **15**, 393-425. doi:10.1146/annurev.es.15.110184.002141
- Williams, G. C.** (1966). *Adaptation and Natural Selection: A Critique of Some Current Evolutionary Thought*. Princeton, NJ: Princeton University Press.
- Williams, S. B., Payne, R. C. and Wilson, A. M.** (2007). Functional specialisation of the pelvic limb of the hare (*Lepus europeus*). *J. Anat.* **210**, 472-490. doi:10.1111/j.1469-7580.2007.00704.x
- Williams, S. B., Usherwood, J. R., Jespers, K., Channon, A. J. and Wilson, A. M.** (2009). Exploring the mechanical basis for acceleration: pelvic limb locomotor function during accelerations in racing greyhounds (*Canis familiaris*). *J. Exp. Biol.* **212**, 550-565. doi:10.1242/jeb.018093
- Winter, D. A.** (2005). *Biomechanics and Motor Control of Human Movement*. Hoboken, NJ: John Wiley & Sons, Inc.
- Witte, H., Biltzinger, J., Hackert, R., Schilling, N., Schmidt, M., Reich, C. and Fischer, M. S.** (2002). Torque patterns of the limbs of small therian mammals during locomotion on flat ground. *J. Exp. Biol.* **205**, 1339-1353.
- Young, J. W.** (2005). Ontogeny of muscle mechanical advantage in capuchin monkeys (*Cebus albifrons* and *Cebus apella*). *J. Zool.* **267**, 351-362. doi:10.1017/S0952836905007521
- Young, J. W.** (2009). Ontogeny of joint mechanics in squirrel monkeys (*Saimiri boliviensis*): implications for mammalian limb growth and locomotor development. *J. Exp. Biol.* **212**, 1576-1591. doi:10.1242/jeb.025460
- Young, J. W., Fernández, D. and Fleagle, J. G.** (2010). Ontogeny of limb bone geometry in capuchin monkeys (*Cebus albifrons* and *Cebus apella*): implications for locomotor development and life history. *Biol. Lett.* **6**, 197-200. doi:10.1098/rsbl.2009.0773
- Young, J. W. and Heard-Booth, A. N.** (2016). Grasping primate development: ontogeny of intrinsic hand and foot proportions in capuchin monkeys (*Cebus albifrons* and *Sapajus apella*). *Am. J. Phys. Anthropol.* **161**, 104-115. doi:10.1002/ajpa.23013
- Young, J. W., Hyde, A. and German, R. Z.** (2019). Ontogeny of intrinsic digit proportions in laboratory rats (*Rattus norvegicus*): a test of the grasping theory of primate hand and foot growth. *Biol. J. Linn. Soc.* **127**, 632-648. doi:10.1093/biolinnean/blz066
